# Supplementary material
Source: PubMed Central journal article supplement (PMC6954457)
Supplement: jnm229187SupplementaryData.pdf [file jnm229187SupplementaryData.pdf]

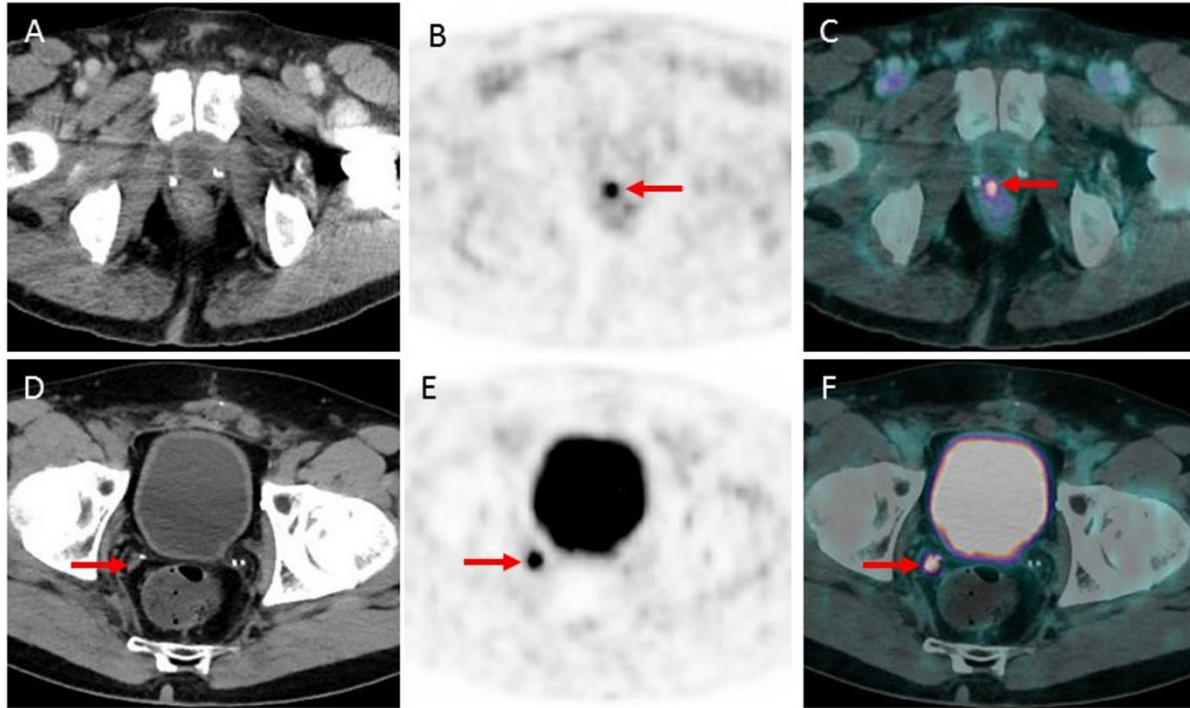

**Supplemental FIGURE 1:**

A-C:  $^{18}\text{F}$ -PSMA-1007 PET/CT examination of a prostate cancer patient (Gleason score 7, T2, N0) with biochemical recurrence (PSA 0.33 ng/ml) after radical prostatectomy. Axial PET and fused  $^{18}\text{F}$ -PSMA-1007 PET/CT show a focal PSMA-ligand uptake in the prostate bed (B, C red arrow) with no morphological correlate on CT images (A).

D-F:  $^{68}\text{Ga}$ -PSMA-11 PET/CT examination of a local recurrent prostate cancer patient (Gleason score 7, T2, N0, PSA 1.0 ng/ml) after radical prostatectomy with focal PSMA-ligand uptake (E, F red arrow). On corresponding CT images a small soft tissue lesion can be observed (D, red arrow). Note, relatively high uptake of  $^{68}\text{Ga}$ -PSMA-11 in the urinary bladder.

Supplemental Table 1: Comparison of SUV mean of lesions attributed to recurrent PC and benign origin in <sup>18</sup>F-PSMA-1007 PET and <sup>68</sup>Ga-PSMA-11 PET according to their localization and origin.

|                                            | Median SUVmax (range)        |                               |
|--------------------------------------------|------------------------------|-------------------------------|
|                                            | <sup>68</sup> Ga-PSMA-11 PET | <sup>18</sup> F-PSMA-1007 PET |
| <b>Lesions attributed to benign origin</b> |                              |                               |
| Total                                      | 4.4 (2.8-7.5)                | 5.3 (3.0-42.7)*               |
| Unspecific LN                              |                              |                               |
| - inguinal                                 | 4.5 (3.6-6.7)                | 5.1 (3.0- 7.5)                |
| - axillary/mediastinal/hilar               | 4.1 (3.9-4.2)                | 4.9 (3.8- 14.9)               |
| Ganglia                                    |                              |                               |
| - cervical                                 | 3.9 (3.3-4.8)                | 5.3 (3.1-10.7)*               |
| - coeliac                                  | 5.2 (4.2-7.0)                | 5.4 (3.1-26.6)                |
| - sacral                                   | none                         | 4.2 (4.0-7.9)                 |
| Bone                                       | 4.5 (2.8-7.5)                | 5.4 (3.6-12.4)*               |
| Others                                     | n.e.                         |                               |
| <b>Lesions attributed to recurrent PC</b>  |                              |                               |
| Total                                      | 9.9 (3.3-112.5)              | 9.4 (2.7-234.4)               |
| Local recurrence                           | 7.5 (3.3-48.2)               | 6.0 (2.7-34.8)                |
| Lymph node metastases                      |                              |                               |
| - abdomino-pelvic                          | 10.8 (3.6-112.5)             | 12.6 (3.4-234.4)              |
| - supradiaphragmatic                       | 13.8 (4.7-80.5)              | 7.5 (3.3-159.9)               |
| Bone metastases                            | 10.6 (3.6-35.4)              | 15.2 (3.4-110.6)              |
| Other metastases                           | 7.4 (5.7-8.5)                | 17.3 (5.6-31.4)               |

\* indicates a significant difference p<0.05

n.e.: non evaluable due to small sample size
